# Supplementary material for: Design and facile synthesis of defect-rich C-MoS 2 /rGO nanosheets for enhanced lithium–sulfur battery performance
Source: publisher site journal article supplement (doi:10.3762/bjnano.10.217), 2019-11-14
Supplement: Additional file 1 [file 2190-4286-10-217-S1.pdf]

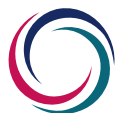

## Supporting Information

for

### **Design and facile synthesis of defect-rich C-MoS<sub>2</sub>/rGO nanosheets for enhanced lithium–sulfur battery performance**

Chengxiang Tian, Juwei Wu, Zheng Ma, Bo Li, Pengcheng Li, Xiaotao Zu and Xia Xiang

*Beilstein J. Nanotechnol.* **2019**, *10*, 2251–2260. doi:10.3762/bjnano.10.217

## Additional experimental data

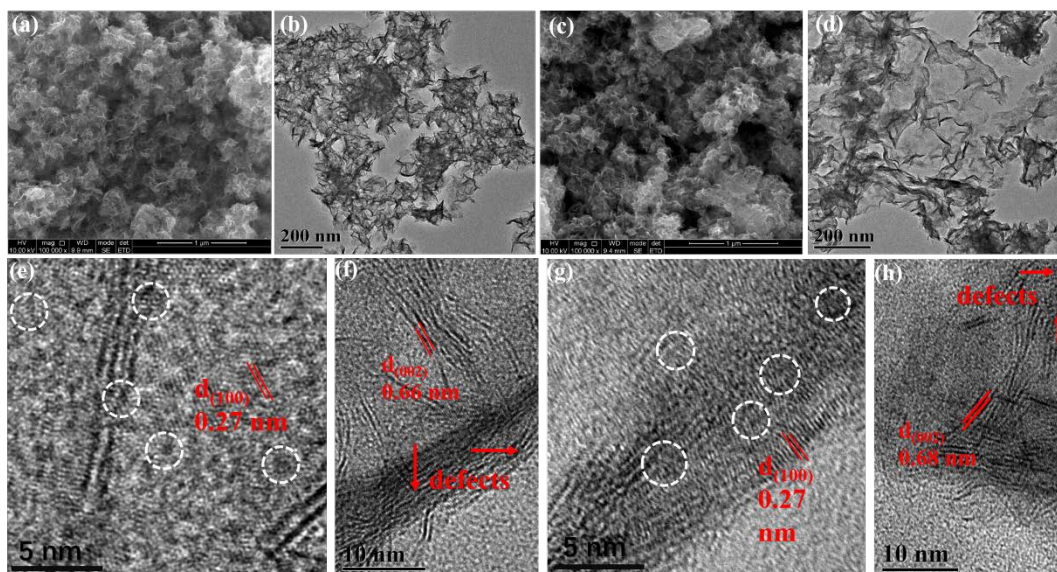

**Figure S1:** Morphological images of the C-MoS<sub>2</sub>/rGO-4 (a) SEM image, (b) TEM image, and (e-f) HRTEM images; Morphological images of the C-MoS<sub>2</sub>/rGO-8 (c) SEM image, (d) TEM image, (g-h) HRTEM images.

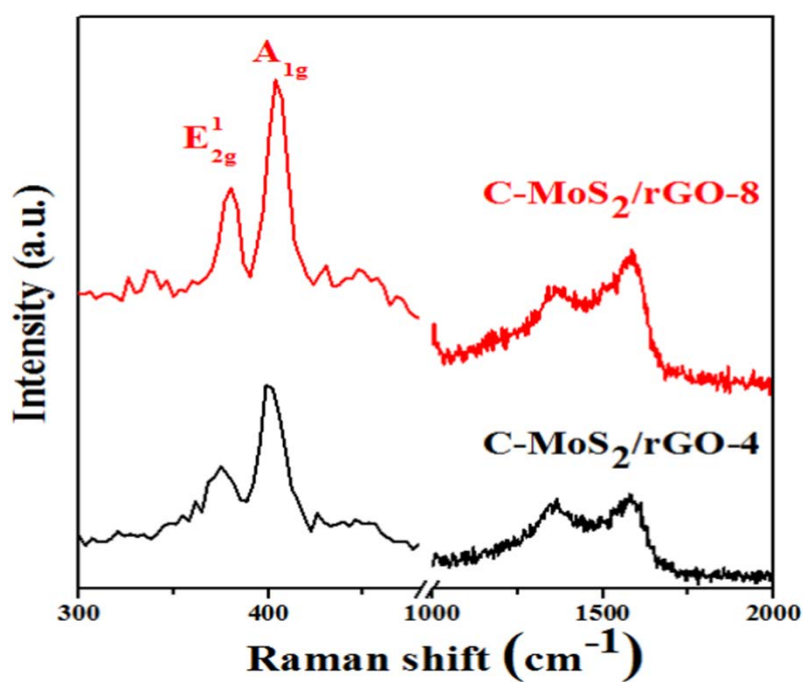

**Figure S2:** Raman spectra of C-MoS<sub>2</sub>/rGO-4 and C-MoS<sub>2</sub>/rGO-8 composites.

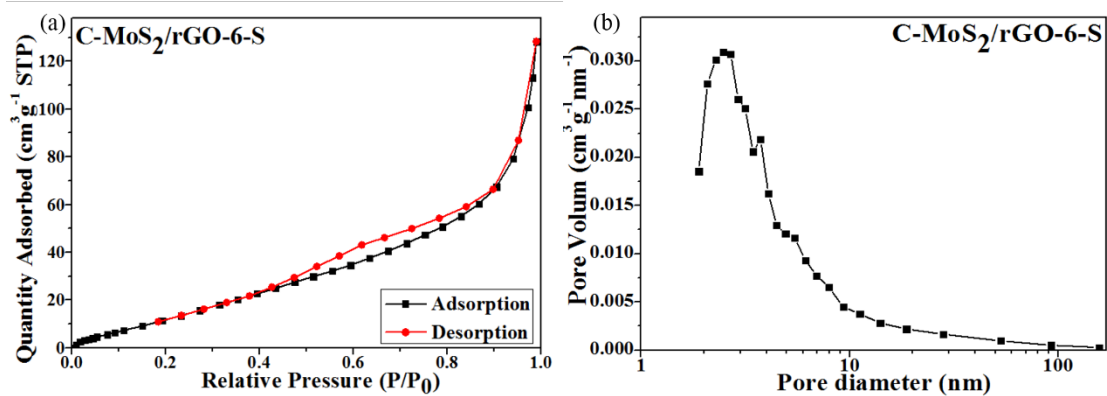

**Figure S3:** (a) N<sub>2</sub> adsorption–desorption isotherm and (b) corresponding pore size distribution of the C-MoS<sub>2</sub>/rGO-6-S composite.

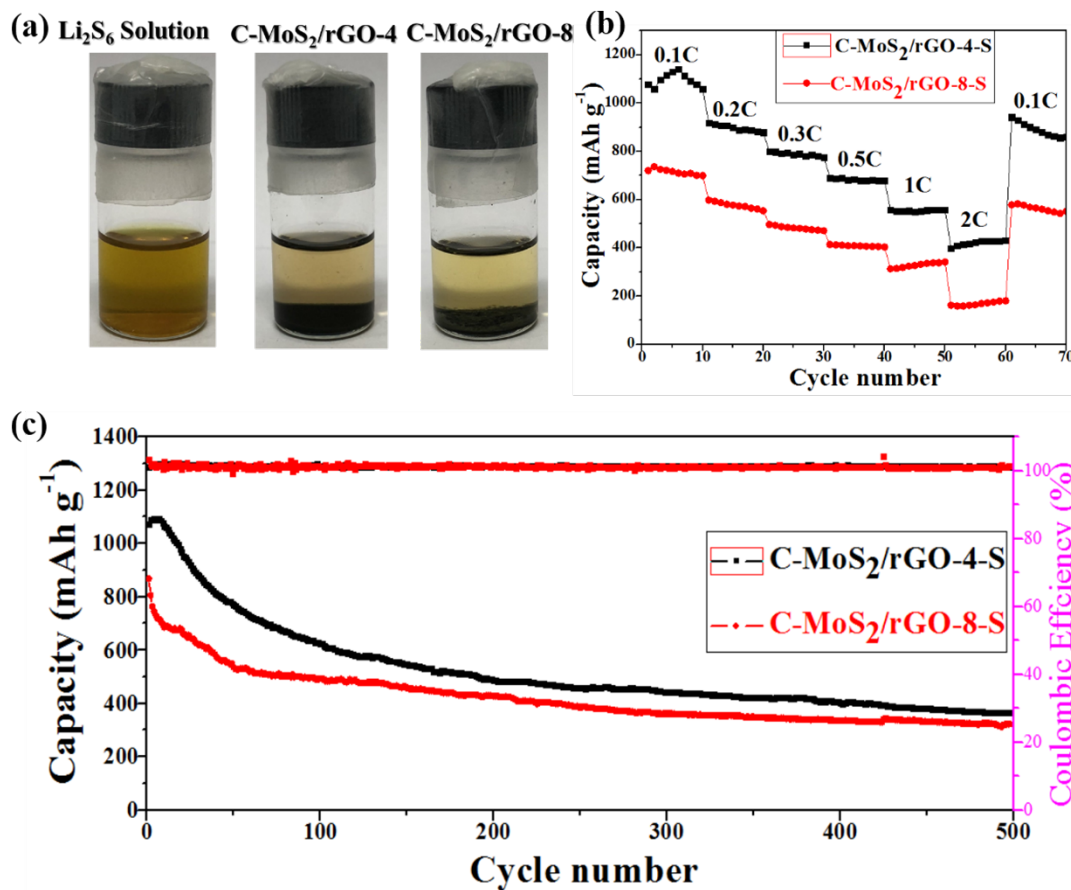

**Figure S4:** (a) Photos of the Li<sub>2</sub>S<sub>6</sub> solution after 12 h of adsorption experiments with the same amount of C-MoS<sub>2</sub>/rGO-4 and C-MoS<sub>2</sub>/rGO-8 composites. (b, c) Rate performances at different current densities and long-term cycling performance at 0.2C of the C-MoS<sub>2</sub>/rGO-4 and C-MoS<sub>2</sub>/rGO-8 composites.
